# Supplementary material for: Endothelin Receptor Autoantibodies as Emerging Biomarkers and Therapeutic Targets in the Cardiovascular Complications of Lupus
Source: Research Square preprint supplement (doi:10.21203/rs.3.rs-6465543/v1), 2025-04-23
Supplement: Supplementary file 1 [file 32e2c9904c537ad5b4458963.docx]

**SUPPLEMENTARY MATERIALS**

**Endothelin Receptor Autoantibodies as Emerging Biomarkers and Therapeutic Targets in the Cardiovascular Complications of Lupus**

Marice K. McCrorey, B.S.1,2, Helen M. Butler, Ph.D.1, Ryan S. Lacey, B.S.1, Marharyta Semenikhina MSc, Ph.D.1, C. Alex Colvert, B.S1,5, Kennedy P. Hawkins, B.S.1, Oleg Palygin MSc, Ph.D.1,5,Adviye Ergul, M.D. Ph.D.3,4, Melissa A. Cunningham, M.D. Ph.D.5, Jim C. Oates, M.D. Ph.D.3,5, Justin P. Van Beusecum, Ph.D.1,3

1Division of Nephrology, Department of Medicine, Medical University of South Carolina, Charleston, SC, USA

2College of Graduate Studies, Medical University of South Carolina, Charleston, SC, USA

3Ralph H. Johnson VA HealthCare System, Charleston, SC, USA

4Department of Pathology and Laboratory Medicine, Medical University of South Carolina, Charleston, USA

5Divison of Rheumatology, Department of Medicine, Medical University of South Carolina, Charleston, SC, USA

**Address for Correspondence:**

Justin P. Van Beusecum, Ph.D.

30 Courtenay Dr.

Gazes/Thurmond Building Rm. 302

Ralph H. Johnson VA Healthcare System

Charleston, South Carolina, 29401

Email: [vanbeuse@musc.edu](mailto:vanbeuse@musc.edu)

**Supplementary Table 1:** ELISAs used to assess plasma biomarkers in the Pilot (Table 1 and 2, and Fig. 1) and Validation Cohorts (Table 3, and Fig. 2-4).

| Biomarker | ELISA Kit | Company | Catalog # |
| --- | --- | --- | --- |
| Anti-ETAR autoantibodies | EIA for Quantitative Determination of anti-Endothelin Receptor A (ETA)-Antibodies ELISA kit | CellTrend GmbH | 13300 |
| Anti-ETBR autoantibodies | EIA for Quantitative Determination of anti-Endothelin Receptor B (ETB)-Antibodies ELISA kit | CellTrend GmbH | 12100 |
| sVCAM-1 | Human VCAM-1/CD106 Quantikine ELISA Kit | R&D Systems | DVC00 |
| sICAM-1 | Human ICAM-1/CD54 Allele-specific Quantikine ELISA Kit | R&D Systems | DCD540 |

**Supplemental Table 2:** Statistical analysis for Fig. 1A by one-tailed Mann-Whitney Test.

| Mann-Whitney Test |  |
| --- | --- |
| P-value | 0.0004 |
| Exact or approximate P value | Exact |
| Sum of ranks, column A,B | 274, 429 |
| Mann-Whitney U | 64 |
| Difference: Actual | 5.218 |
| Hodges-Lehmann | 4.844 |

**Supplemental Table 3:** Statistical analysis for Fig. 1B by one-tailed Mann-Whitney Test.

| Mann-Whitney Test |  |
| --- | --- |
| P-value | 0.0107 |
| Exact or approximate P value | Exact |
| Sum of ranks, column A,B | 305, 398 |
| Mann-Whitney U | 95 |
| Difference: Actual | 7.508 |
| Hodges-Lehmann | 8.209 |

**Supplemental Table 4:** Statistical analysis for Fig. 1C by one-tailed Mann-Whitney Test.

| Mann-Whitney Test |  |
| --- | --- |
| P-value | <0.0001 |
| Exact or approximate P value | Exact |
| Sum of ranks, column A,B | 248, 455 |
| Mann-Whitney U | 38 |
| Difference: Actual | 454.5 |
| Hodges-Lehmann | 421.0 |

**Supplemental Table 5:** Statistical analysis for Fig. 1D by Spearman r correlation.

| Spearman r correlation |  |
| --- | --- |
| R | 0.3871 |
| 95% confidence interval | 0.06218 to 0.6378 |
| P-value | 0.0180 |
| Exact or approximate P value | Approximate |

**Supplemental Table 6:** Statistical analysis for Fig. 1E by Spearman r correlation.

| Spearman r correlation |  |
| --- | --- |
| R | 0.1961 |
| 95% confidence interval | -0.1463 to 0.4966 |
| P-value | 0.2247 |
| Exact or approximate P value | Approximate |

**Supplemental Table 7:** Statistical analysis for Fig. 2A by one-tailed Mann-Whitney Test.

| Mann-Whitney Test |  |
| --- | --- |
| P-value | <0.0001 |
| Exact or approximate P value | Exact |
| Sum of ranks, column A,B | 4683, 11070 |
| Mann-Whitney U | 1362 |
| Difference: Actual | 7.499 |
| Hodges-Lehman | 6.887 |

**Supplemental Table 8:** Statistical analysis for Fig. 2B by one-tailed Mann-Whitney Test.

| Mann-Whitney Test |  |
| --- | --- |
| P-value | <0.0001 |
| Exact or approximate P value | Exact |
| Sum of ranks, column A,B | 5134, 10620 |
| Mann-Whitney U | 1813 |
| Difference: Actual | 11.96 |
| Hodges-Lehmann | 10.60 |

**Supplemental Table 9:** Statistical Analysis for Fig. 2C by Kruskal-Wallis with Dunn’s multiple comparisons.

| Kruskal-Wallis Test |  |
| --- | --- |
| P-value | <0.0001 |
| Exact or approximate P value | Approximate |
| Number of Groups | 4 |
| Kruskal-Wallis Statistic | 56.33 |
| Number of treatments | 4 |
| Number of values | 177 |

| Dunn’s multiple comparisons test | Mean Rank diff. | Significant | Adjusted P-value |
| --- | --- | --- | --- |
| Non-SLE Non-HTN vs. Non-SLE HTN | 9.567 | No | >0.9999 |
| Non-SLE Non-HTN vs. SLE Non-HTN | -50.25 | Yes | <0.0001 |
| Non-SLE Non-HTN vs. SLE-HTN | -56.12 | Yes | <0.0001 |
| Non-SLE HTN vs. SLE Non-HTN | -59.82 | Yes | <0.0001 |
| Non-SLE HTN vs. SLE-HTN | -65.68 | Yes | <0.0001 |
| SLE Non-HTN vs. SLE-HTN | -5.865 | No | >0.9999 |

| Test Details | Mean Rank 1 | Mean Rank 2 | Mean Rank | n1 | n2 | Z |
| --- | --- | --- | --- | --- | --- | --- |
| Non-SLE Non-HTN vs. Non-SLE HTN | 62.07 | 52.50 | 9.567 | 45 | 36 | 0.8350 |
| Non-SLE Non-HTN vs. SLE Non-HTN | 62.07 | 112.3 | -50.25 | 45 | 47 | 4.702 |
| Non-SLE Non-HTN vs. SLE-HTN | 62.07 | 118.2 | -56.12 | 45 | 49 | 5.304 |
| Non-SLE HTN vs. SLE Non-HTN | 52.50 | 112.3 | -59.82 | 36 | 47 | 5.271 |
| Non-SLE HTN vs. SLE-HTN | 52.50 | 118.2 | -65.68 | 36 | 49 | 5.840 |
| SLE Non-HTN vs. SLE-HTN | 112.3 | 118.2 | -5.865 | 47 | 49 | 0.5606 |

**Supplementary Table 10:** Statistical Analysis for Fig. 2D by Kruskal-Wallis with Dunn’s multiple comparisons.

| Kruskal-Wallis Test |  |
| --- | --- |
| P-value | <0.0001 |
| Exact or approximate P value | Approximate |
| Number of Groups | 4 |
| Kruskal-Wallis Statistic | 38.76 |
| Number of treatments | 4 |
| Number of values (total) | 177 |

| Dunn’s multiple comparisons test | Mean Rank diff. | Significant | Adjusted P-value |
| --- | --- | --- | --- |
| Non-SLE Non-HTN vs. non-SLE HTN | -9.122 | No | >0.9999 |
| Non-SLE Non-HTN vs. SLE Non-HTN | -56.02 | Yes | <0.0001 |
| Non-SLE Non-HTN vs. SLE-HTN | -46.77 | Yes | <0.0001 |
| Non-SLE HTN vs. SLE Non-HTN | -46.90 | Yes | 0.0002 |
| Non-SLE HTN vs. SLE-HTN | -37.65 | Yes | 0.0049 |
| SLE Non-HTN vs. SLE-HTN | 9.249 | No | >0.9999 |

| Test Details | Mean Rank 1 | Mean Rank 2 | Mean Rank | n1 | n2 | Z |
| --- | --- | --- | --- | --- | --- | --- |
| Non-SLE Non-HTN vs. Non-SLE HTN | 59.32 | 68.44 | -9.122 | 45 | 36 | 0.7962 |
| Non-SLE Non-HTN vs. SLE Non-HTN | 59.32 | 115.3 | -56.02 | 45 | 47 | 5.242 |
| Non-SLE Non-HTN vs. SLE-HTN | 59.32 | 106.1 | -46.77 | 45 | 49 | 4.421 |
| Non-SLE HTN vs. SLE Non-HTN | 68.44 | 115.3 | -46.90 | 36 | 47 | 4.132 |
| Non-SLE HTN vs. SLE-HTN | 68.44 | 106.1 | -37.65 | 36 | 49 | 3.347 |
| SLE Non-HTN vs. SLE-HTN | 115.3 | 106.1 | 9.249 | 47 | 49 | 0.8841 |

**Supplementary Table 11:** Statistical Analysis for Fig. 2E (females) by Kruskal-Wallis with Dunn’s multiple comparisons.

| Kruskal-Wallis Test |  |
| --- | --- |
| P-value | <0.0001 |
| Exact or approximate P value | Approximate |
| Number of Groups | 4 |
| Kruskal-Wallis Statistic | 37.18 |
| Number of treatments | 4 |
| Number of values (total) | 125 |

| Dunn’s multiple comparisons test | Mean Rank diff. | Significant | Adjusted P-value |
| --- | --- | --- | --- |
| ♀-Non-SLE Non-HTN vs. ♀-Non-SLE HTN | 7.941 | No | >0.9999 |
| ♀-Non-SLE Non-HTN vs. ♀-SLE Non-HTN | -28.33 | Yes | 0.0125 |
| ♀-Non-SLE Non-HTN vs. ♀-SLE-HTN | -40.04 | Yes | <0.0001 |
| ♀-Non-SLE HTN vs. ♀-SLE Non-HTN | -36.27 | Yes | 0.0006 |
| ♀-Non-SLE HTN vs. ♀-SLE-HTN | -47.98 | Yes | <0.0001 |
| ♀-SLE Non-HTN vs. ♀-SLE-HTN | -11.70 | No | >0.9999 |

| Test Details | Mean Rank 1 | Mean Rank 2 | Mean Rank | n1 | n2 | Z |
| --- | --- | --- | --- | --- | --- | --- |
| ♀-Non-SLE Non-HTN vs. ♀-Non-SLE HTN | 46.70 | 38.76 | 7.941 | 30 | 29 | 0.8418 |
| ♀-Non-SLE Non-HTN vs. ♀-SLE Non-HTN | 46.70 | 75.03 | -28.33 | 30 | 32 | 3.077 |
| ♀-Non-SLE Non-HTN vs. ♀-SLE-HTN | 46.70 | 86.74 | -40.04 | 30 | 34 | 4.412 |
| ♀-Non-SLE HTN vs. ♀-SLE Non-HTN | 38.76 | 75.03 | -36.27 | 29 | 32 | 3.905 |
| ♀-Non-SLE HTN vs. ♀-SLE-HTN | 38.76 | 86.74 | -47.98 | 29 | 34 | 5.239 |
| ♀-SLE Non-HTN vs. ♀-SLE-HTN | 75.03 | 86.74 | -11.70 | 32 | 34 | 1.312 |

**Supplementary Table 12:** Statistical Analysis for Fig. 2E (males) by Kruskal-Wallis with Dunn’s multiple comparisons.

| Kruskal-Wallis Test |  |
| --- | --- |
| P-value | <0.0001 |
| Exact or approximate P value | Approximate |
| Number of Groups | 4 |
| Kruskal-Wallis Statistic | 21.61 |
| Number of treatments | 4 |
| Number of values (total) | 52 |

| Dunn’s multiple comparisons test | Mean Rank diff. | Significant | Adjusted P-value |
| --- | --- | --- | --- |
| ♂-Non-SLE Non-HTN vs. ♂-Non-SLE HTN | 4.095 | No | >0.9999 |
| ♂-Non-SLE Non-HTN vs. ♂-SLE Non-HTN | -20.27 | Yes | 0.0015 |
| ♂-Non-SLE Non-HTN vs. ♂-SLE-HTN | -15.73 | Yes | 0.0268 |
| ♂-Non-SLE HTN vs. ♂-SLE Non-HTN | -24.36 | Yes | 0.0027 |
| ♂-Non-SLE HTN vs. ♂-SLE-HTN | -19.83 | Yes | 0.0255 |
| ♂-SLE Non-HTN vs. ♂-SLE-HTN | 4.533 | No | >0.9999 |

| Test Details | Mean Rank 1 | Mean Rank 2 | Mean Rank | n1 | n2 | Z |
| --- | --- | --- | --- | --- | --- | --- |
| ♂-Non-SLE Non-HTN vs. ♂-Non-SLE HTN | 16.67 | 12.57 | 4.095 | 15 | 7 | 0.5904 |
| ♂-Non-SLE Non-HTN vs. ♂-SLE Non-HTN | 16.67 | 36.93 | -20.27 | 15 | 15 | 3.662 |
| ♂-Non-SLE Non-HTN vs. ♂-SLE-HTN | 16.67 | 32.40 | -15.73 | 15 | 15 | 2.843 |
| ♂-Non-SLE HTN vs. ♂-SLE Non-HTN | 12.57 | 36.93 | -24.36 | 7 | 15 | 3.512 |
| ♂-Non-SLE HTN vs. ♂-SLE-HTN | 12.57 | 32.40 | -19.83 | 7 | 15 | 2.858 |
| ♂-SLE Non-HTN vs. ♂-SLE-HTN | 26.93 | 32.40 | 4.533 | 15 | 15 | 0.8192 |

**Supplementary Table 13:** Statistical Analysis for Fig. 2F (females) by Kruskal-Wallis with Dunn’s multiple comparisons.

| Kruskal-Wallis Test |  |
| --- | --- |
| P-value | 0.0010 |
| Exact or approximate P value | Approximate |
| Number of Groups | 4 |
| Kruskal-Wallis Statistic | 16.21 |
| Number of treatments | 4 |
| Number of values (total) | 125 |

| Dunn’s multiple comparisons test | Mean Rank diff. | Significant | Adjusted P-value |
| --- | --- | --- | --- |
| ♀-Non-SLE Non-HTN vs. ♀-Non-SLE HTN | -2.050 | No | >0.9999 |
| ♀-Non-SLE Non-HTN vs. ♀-SLE Non-HTN | -14.83 | No | 0.6432 |
| ♀-Non-SLE Non-HTN vs. ♀-SLE-HTN | -32.27 | Yes | 0.0023 |
| ♀-Non-SLE HTN vs. ♀-SLE Non-HTN | -12.78 | No | >0.9999 |
| ♀-Non-SLE HTN vs. ♀-SLE-HTN | -30.22 | Yes | 0.0058 |
| ♀-SLE Non-HTN vs. ♀-SLE-HTN | -17.44 | No | 0.3039 |

| Test Details | Mean Rank 1 | Mean Rank 2 | Mean Rank | n1 | n2 | Z |
| --- | --- | --- | --- | --- | --- | --- |
| ♀-Non-SLE Non-HTN vs. ♀-Non-SLE HTN | 49.95 | 52.00 | -2.050 | 30 | 29 | 0.2173 |
| ♀-Non-SLE Non-HTN vs. ♀-SLE Non-HTN | 49.95 | 64.78 | -14.83 | 30 | 32 | 1.611 |
| ♀-Non-SLE Non-HTN vs. ♀-SLE-HTN | 49.95 | 82.22 | -32.27 | 30 | 34 | 3.556 |
| ♀-Non-SLE HTN vs. ♀-SLE Non-HTN | 52.00 | 64.78 | -12.78 | 29 | 32 | 1.376 |
| ♀-Non-SLE HTN vs. ♀-SLE-HTN | 52.00 | 82.22 | -30.22 | 29 | 34 | 3.300 |
| ♀-SLE Non-HTN vs. ♀-SLE-HTN | 64.78 | 82.22 | -17.44 | 32 | 34 | 1.954 |

**Supplementary Table 14:** Statistical analysis for Fig. 2F (males) by Kruskal-Wallis with Dunn’s multiple comparisons.

| Kruskal-Wallis Test |  |
| --- | --- |
| P-value | 0.0034 |
| Exact or approximate P value | Approximate |
| Number of Groups | 4 |
| Kruskal-Wallis Statistic | 13.68 |
| Number of treatments | 4 |
| Number of values (total) | 52 |

| Dunn’s multiple comparisons test | Mean Rank diff. | Significant | Adjusted P-value |
| --- | --- | --- | --- |
| ♂-Non-SLE Non-HTN vs. ♂-Non-SLE HTN | -5.219 | No | >0.9999 |
| ♂-Non-SLE Non-HTN vs. ♂-SLE Non-HTN | -18.47 | Yes | 0.0051 |
| ♂-Non-SLE Non-HTN vs. ♂-SLE-HTN | -15.27 | Yes | 0.0348 |
| ♂-Non-SLE HTN vs. ♂-SLE Non-HTN | -13.25 | No | 0.3370 |
| ♂-Non-SLE HTN vs. ♂-SLE-HTN | -10.05 | No | 0.8850 |
| ♂-SLE Non-HTN vs. ♂-SLE-HTN | 3.200 | No | >0.9999 |

| Test Details | Mean Rank 1 | Mean Rank 2 | Mean Rank | n1 | n2 | Z |
| --- | --- | --- | --- | --- | --- | --- |
| ♂-Non-SLE Non-HTN vs. ♂-Non-SLE HTN | 16.07 | 21.29 | -5.219 | 15 | 7 | 0.7524 |
| ♂-Non-SLE Non-HTN vs. ♂-SLE Non-HTN | 16.07 | 34.53 | -18.47 | 15 | 15 | 3.337 |
| ♂-Non-SLE Non-HTN vs. ♂-SLE-HTN | 16.07 | 31.33 | -15.27 | 15 | 15 | 2.759 |
| ♂-Non-SLE HTN vs. ♂-SLE Non-HTN | 21.29 | 34.53 | -13.25 | 7 | 15 | 1.910 |
| ♂-Non-SLE HTN vs. ♂-SLE-HTN | 21.29 | 31.33 | -10.05 | 7 | 15 | 1.448 |
| ♂-SLE Non-HTN vs. ♂-SLE-HTN | 34.53 | 31.33 | 3.200 | 15 | 15 | 0.5783 |

**Supplemental Table 15:** Statistical analysis for Fig. 3A by Mann-Whitney Test.

| Mann-Whitney Test |  |
| --- | --- |
| P-value | <0.0001 |
| Exact or approximate P value | Exact |
| Sum of ranks, column A,B | 5140, 10614 |
| Mann-Whitney U | 1819 |
| Difference: Actual | 265.7 |
| Hodges-Lehmann | 275.5 |

**Supplemental Table 16:** Statistical analysis for Fig. 3B by Mann-Whitney Test.

| Mann-Whitney Test |  |
| --- | --- |
| P-value | 0.0534 |
| Exact or approximate P value | Exact |
| Sum of ranks, column A,B | 6661, 9092 |
| Mann-Whitney U | 3340 |
| Difference: Actual | 37.45 |
| Hodges-Lehmann | 39.70 |

**Supplemental Table 17:** Statistical analysis for Fig. 3C by Kruskal-Wallis with Dunn’s multiple comparisons.

| Kruskal-Wallis Test |  |
| --- | --- |
| P-value | <0.0001 |
| Exact or approximate P value | Approximate |
| Number of Groups | 4 |
| Kruskal-Wallis Statistic | 43.98 |
| Number of treatments | 4 |
| Number of values (total) | 177 |

| Dunn’s multiple comparisons test | Mean Rank diff. | Significant | Adjusted P-value |
| --- | --- | --- | --- |
| Non-SLE Non-HTN vs. non-SLE HTN | 22.31 | No | >0.3090 |
| Non-SLE Non-HTN vs. SLE Non-HTN | -27.86 | No | 0.0549 |
| Non-SLE Non-HTN vs. SLE-HTN | -46.14 | Yes | <0.0001 |
| Non-SLE HTN vs. SLE Non-HTN | -50.17 | Yes | <0.0001 |
| Non-SLE HTN vs. SLE-HTN | -68.45 | Yes | <0.0001 |
| SLE Non-HTN vs. SLE-HTN | -18.29 | No | 0.4828 |

| Test Details | Mean Rank 1 | Mean Rank 2 | Mean Rank | n1 | n2 | Z |
| --- | --- | --- | --- | --- | --- | --- |
| Non-SLE Non-HTN vs. Non-SLE HTN | 73.37 | 51.06 | 22.31 | 45 | 36 | 1.947 |
| Non-SLE Non-HTN vs. SLE Non-HTN | 73.37 | 101.2 | -27.86 | 45 | 47 | 2.607 |
| Non-SLE Non-HTN vs. SLE-HTN | 73.37 | 119.5 | -46.14 | 45 | 49 | 4.362 |
| Non-SLE HTN vs. SLE Non-HTN | 51.06 | 101.2 | -50.17 | 36 | 47 | 4.421 |
| Non-SLE HTN vs. SLE-HTN | 51.06 | 119.5 | -68.45 | 36 | 49 | 6.086 |
| SLE Non-HTN vs. SLE-HTN | 101.2 | 119.5 | -18.29 | 47 | 49 | 1.748 |

**Supplemental Table 18:** Statistical Analysis for Fig. 3D (females) by Kruskal-Wallis with Dunn’s multiple comparisons.

| Kruskal-Wallis Test |  |
| --- | --- |
| P-value | <0.0001 |
| Exact or approximate P value | Approximate |
| Number of Groups | 4 |
| Kruskal-Wallis Statistic | 43.77 |
| Number of treatments | 4 |
| Number of values (total) | 125 |

| Dunn’s multiple comparisons test | Mean Rank diff. | Significant | Adjusted P-value |
| --- | --- | --- | --- |
| ♀-Non-SLE Non-HTN vs. ♀-Non-SLE HTN | 21.11 | No | 0.1515 |
| ♀-Non-SLE Non-HTN vs. ♀-SLE Non-HTN | -20.90 | No | 0.1391 |
| ♀-Non-SLE Non-HTN vs. ♀-SLE-HTN | -35.77 | Yes | 0.0005 |
| ♀-Non-SLE HTN vs. ♀-SLE Non-HTN | -42.01 | Yes | <0.0001 |
| ♀-Non-SLE HTN vs. ♀-SLE-HTN | -56.88 | Yes | <0.0001 |
| ♀-SLE Non-HTN vs. ♀-SLE-HTN | -14.87 | No | 0.5737 |

| Test Details | Mean Rank 1 | Mean Rank 2 | Mean Rank | n1 | n2 | Z |
| --- | --- | --- | --- | --- | --- | --- |
| ♀-Non-SLE Non-HTN vs. ♀-Non-SLE HTN | 52.82 | 31.71 | 21.11 | 30 | 29 | 2.238 |
| ♀-Non-SLE Non-HTN vs. ♀-SLE Non-HTN | 52.82 | 73.72 | -20.90 | 30 | 32 | 2.270 |
| ♀-Non-SLE Non-HTN vs. ♀-SLE-HTN | 52.82 | 88.59 | -35.77 | 30 | 34 | 3.942 |
| ♀-Non-SLE HTN vs. ♀-SLE Non-HTN | 31.71 | 73.72 | -42.01 | 29 | 32 | 4.523 |
| ♀-Non-SLE HTN vs. ♀-SLE-HTN | 31.71 | 88.59 | -56.88 | 29 | 34 | 6.211 |
| ♀-SLE Non-HTN vs. ♀-SLE-HTN | 73.72 | 88.59 | -14.87 | 32 | 34 | 1.666 |

**Supplemental Table 19:** Statistical analysis for Fig. 3D (males) by Kruskal-Wallis with Dunn’s multiple comparisons.

| Kruskal-Wallis Test |  |
| --- | --- |
| P-value | 0.2904 |
| Exact or approximate P value | Approximate |
| Number of Groups | 4 |
| Kruskal-Wallis Statistic | 3.745 |
| Number of treatments | 4 |
| Number of values (total) | 52 |

| Dunn’s multiple comparisons test | Mean Rank diff. | Significant | Adjusted P-value |
| --- | --- | --- | --- |
| ♂-Non-SLE Non-HTN vs. ♂-Non-SLE HTN | -4.843 | No | >0.9999 |
| ♂-Non-SLE Non-HTN vs. ♂-SLE Non-HTN | -7.033 | No | >0.9999 |
| ♂-Non-SLE Non-HTN vs. ♂-SLE-HTN | -10.47 | No | 0.3514 |
| ♂-Non-SLE HTN vs. ♂-SLE Non-HTN | -2.190 | No | >0.9999 |
| ♂-Non-SLE HTN vs. ♂-SLE-HTN | -5.624 | No | >0.9999 |
| ♂-SLE Non-HTN vs. ♂-SLE-HTN | -3.433 | No | >0.9999 |

| Test Details | Mean Rank 1 | Mean Rank 2 | Mean Rank | n1 | n2 | Z |
| --- | --- | --- | --- | --- | --- | --- |
| ♂-Non-SLE Non-HTN vs. ♂-Non-SLE HTN | 20.80 | 25.64 | -4.843 | 15 | 7 | 0.6981 |
| ♂-Non-SLE Non-HTN vs. ♂-SLE Non-HTN | 20.80 | 27.83 | -7.033 | 15 | 15 | 1.271 |
| ♂-Non-SLE Non-HTN vs. ♂-SLE-HTN | 20.80 | 31.27 | -10.47 | 15 | 15 | 1.891 |
| ♂-Non-SLE HTN vs. ♂-SLE Non-HTN | 25.64 | 27.83 | -2.190 | 7 | 15 | 0.3158 |
| ♂-Non-SLE HTN vs. ♂-SLE-HTN | 25.64 | 31.27 | -5.624 | 7 | 15 | 0.8107 |
| ♂-SLE Non-HTN vs. ♂-SLE-HTN | 27.82 | 31.27 | -3.433 | 15 | 15 | 0.6205 |

**Supplemental Table 20:** Principal component analysis (PCA) results for Fig. 4A and B.

|  | PC1 | PC2 | PC3 | PC4 | PC5 | PC6 | PC7 |
| --- | --- | --- | --- | --- | --- | --- | --- |
| SBP | 0.64763947 | 0.20545706 | -0.03185531 | 0.13454115 | 0.04097011 | -0.08699747 | 0.71322579 |
| PP | 0.47890244 | 0.20797389 | 0.52480489 | 0.04089515 | 0.43621486 | -0.03328060 | -0.50883759 |
| DBP | 0.45417053 | 0.08445285 | -0.60107325 | 0.15588802 | -0.39981919 | -0.09358443 | -0.48207184 |
| sVCAM-1 | 0.24677812 | -0.57679266 | -0.09045208 | 0.10539656 | 0.16017819 | 0.74930882 | -4.19 x 10-18 |
| Anti-ETAR | 0.21661792 | -0.36778592 | 0.53098467 | -0.21958881 | -0.68925623 | -0.11212519 | 2.56 x 10-17 |
| Anti-ETBR | 0.16243482 | -0.53616369 | -0.24699514 | -0.46890762 | 0.37941264 | -0.51118342 | 2.51 x 10-17 |
| sICAM1 | 0.09716255 | 0.38983867 | -0.1055608 | -0.82263183 | -0.05913955 | 0.38369457 | 2.55 x 10-17 |
|  |  |  |  |  |  |  |  |
| Importance of Components: | **PC1** | **PC2** | **PC3** | **PC4** | **PC5** | **PC6** | **PC7** |
|  |  |  |  |  |  |  |  |
| Standard Deviation | 1.4809 | 1.1018 | 1.0269 | 0.9946 | 0.8925 | 0.8675 | 5.33 x 10-16 |
| Proportion of Variance | 0.3133 | 0.1734 | 0.1507 | 0.1413 | 0.1138 | 0.1075 | 0.00 |
| Cumulative Proportion | 0.3133 | 0.4867 | 0.6374 | 0.7787 | 0.8925 | 1 | 1.00 |

**Supplemental Table 21:** Correlation Matrix results and statistical analysis for Fig. 4C by Spearman r.

**P Values**

| SBP | - |  |  |  |  |  |  |
| --- | --- | --- | --- | --- | --- | --- | --- |
| DBP | 2.037 x 10-30 | **-** |  |  |  |  |  |
| PP | 7.115 x 10-26 | 0.165 | **-** |  |  |  |  |
| sVCAM-1 | 0.020 | 0.142 | 0.051 | **-** |  |  |  |
| sICAM-1 | 0.076 | 0.460 | 0.148 | 0.054 | **-** |  |  |
| Anti-ETAR | 0.024 | 0.011 | 0.498 | 7.829 x 10-7 | 0.006 | **-** |  |
| Anti-ETBR | 0.0454 | 0.044 | 0.926 | 4.984 x 10-7 | 0.097 | 5.203 x 10-21 | **-** |
|  | **SBP** | **DBP** | **PP** | **sVCAM-1** | **sICAM-1** | **Anti-ETAR** | **Anti-ETBR** |

**Confidence Intervals**

| SBP | - |  |  |  |  |  |  |
| --- | --- | --- | --- | --- | --- | --- | --- |
| DBP | 0.6469 to 0.7917 | **-** |  |  |  |  |  |
| PP | 0.5953 to 0.7581 | -0.0478 to 0.2525 | **-** |  |  |  |  |
| sVCAM-1 | 0.0226 to 0.3172 | -0.0417 to 0.2582 | -0.0056 to 0.2916 | **-** |  |  |  |
| sICAM-1 | -0.0185 to 0.2798 | -0.0967 to 0.2059 | -0.0434 to 0.2566 | -0.2906 to 0.0067 | **-** |  |  |
| Anti-ETAR | 0.0180 to 0.3131 | 0.0391 to 0.3320 | -0.1014 to 0.2014 | 0.2216 to 0.4864 | 0.0571 to 0.3480 | **-** |  |
| Anti-ETBR | -0.0012 to 0.2956 | -0.0002 to 0.2965 | -0.1450 to 1.586 | 0.1552 to 0.4321 | -0.02712 to 0.2718 | 0.5294 to 0.7140 | **-** |
|  | **SBP** | **DBP** | **PP** | **sVCAM-1** | **sICAM-1** | **Anti-ETAR** | **Anti-ETBR** |
